# Supplementary material for: XIAP promotes metastasis of bladder cancer cells by ubiquitylating YTHDC1
Source: Springer Nature journal article supplement (doi:10.1038/s41419-025-07545-9), 2025-03-25
Supplement: MOESM1 [file 41419_2025_7545_MOESM1_ESM.pdf]

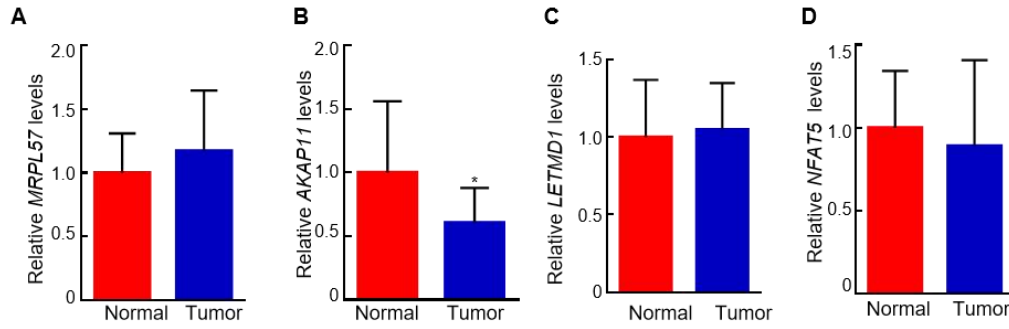

**Figure S1.** The expressions of MRPL57 (A), AKAP11 (B), LETMD1 (C), and NFAT5 (D) in TCGA database.

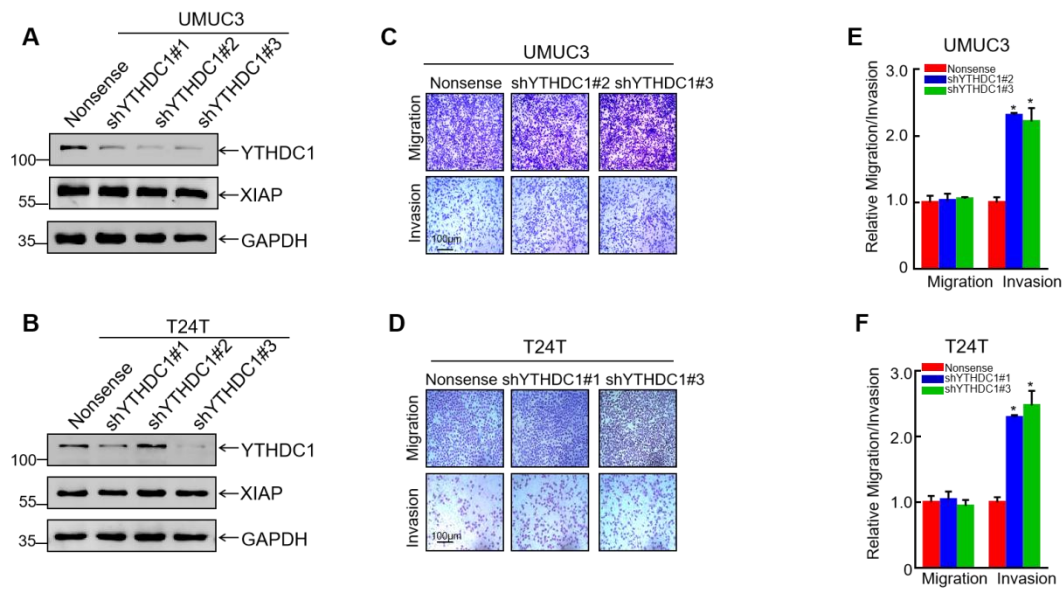

**Figure S2.** A, B Plasmids nonsense, shYTHDC1#1, shYTHDC1#2 and shYTHDC1#3 are packed with lentivirus to infect UMUC3 (A) and T24T cells (B), and the knockdown efficiency is detected by Western blotting. C, D Transwell assay was used to detect the effects of YTHDC1 knockdown on migration and invasion ability of UMUC3 (C) and T24T cells (D). E, F The statistical results of migration and invasion ability of YTHDC1 knockdown in UMUC3 (E) and T24T cells (F), \* $p < 0.05$ .

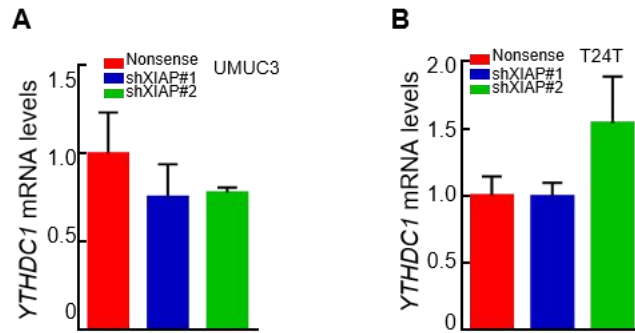

**Figure S3.** YTHDC1 mRNA levels were detected in XIAP knockdown UMUC3 (A) and T24T (B) cells by real-time PCR.

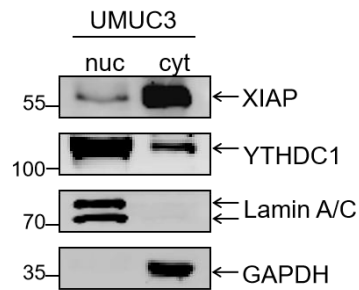

**Figure S4.** Nucleo-plasmic separation assay was performed in UMUC3 cells to detect XIAP and YTHDC1 localization.

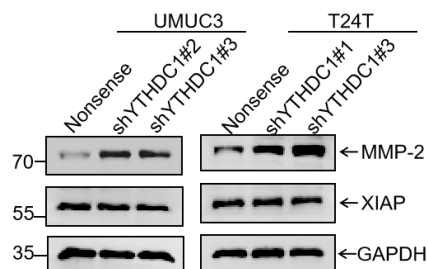

**Figure S5.** Western blot was used to detect the protein expression levels of MMP-2 in UMUC3/T24T (shYTHDC1) cells.

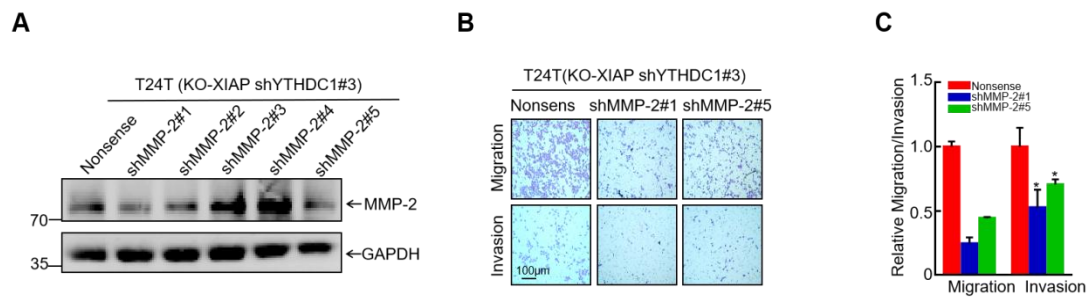

**Figure S6.** **A** MMP-2 knockdown efficiency were detected in T24T (KO-XIAP shYTHDC1#3) cells by Western blotting. **B** Transwell assay was used to detect the effects of MMP-2 knockdown on migration and invasion ability of T24T (KO-XIAP shYTHDC1#3) cells. **C** The statistical results of migration and invasion ability,  $*p < 0.05$ .

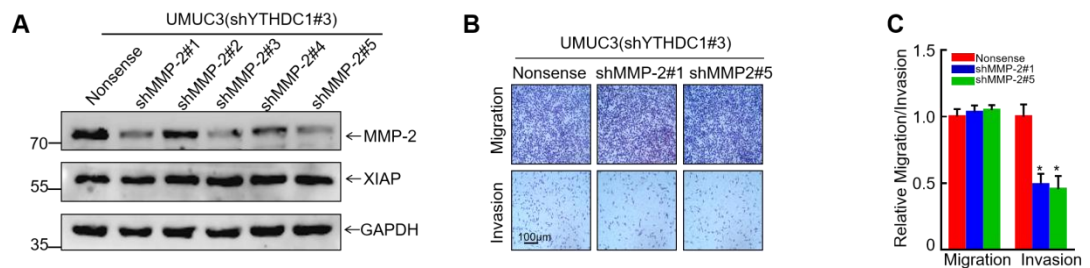

**Figure S7.** **A** MMP-2 knockdown efficiency were detected in UMUC3 (shYTHDC1#3) cells by Western blotting. **B** Transwell assay was used to detect the effects of MMP-2 knockdown on migration and invasion ability of UMUC3 (shYTHDC1#3) cells. **C** The statistical results of migration and invasion ability,  $*p < 0.05$ .

**Table S1. Clinical case information of 17 patients**

| case(NO#) | medical record NO | gender | age | NMIBC/MIBC | stage |
|-----------|-------------------|--------|-----|------------|-------|
| 1#        | 1791873           | male   | 66  | MIBC       | T2b   |
| 2#        | 1919124           | male   | 64  | MIBC       | T2b   |
| 3#        | 1941718           | male   | 70  | MIBC       | T2a   |
| 4#        | 2211748           | male   | 55  | NMIBC      | T1    |
| 5#        | 3019780           | male   | 52  | MIBC       | T2a   |
| 6#        | 3178143           | male   | 79  | MIBC       | T2b   |
| 7#        | 3185908           | male   | 68  | NMIBC      | Ta    |
| 8#        | 3190758           | male   | 78  | MIBC       | T4a   |
| 9#        | 3191919           | male   | 82  | NMIBC      | Ta    |
| 10#       | 3192384           | male   | 73  | NMIBC      | T1    |
| 11#       | 3192465           | male   | 62  | MIBC       | T3    |
| 12#       | 3197219           | male   | 65  | NMIBC      | T1    |
| 13#       | 3199069           | male   | 67  | MIBC       | T3a   |
| 14#       | 3203757           | male   | 68  | NMIBC      | T1    |
| 15#       | 3204805           | male   | 78  | NMIBC      | T1    |
| 16#       | 3209293           | male   | 71  | NMIBC      | T1    |
| 17#       | 9242379           | male   | 55  | MIBC       | T2b   |
